# Supplementary material
Source: PubMed Central journal article supplement (PMC4771503)
Supplement: 10-1055-s-0035-1558230-sup_gf980.pdf [file 10-1055-s-0035-1558230-sup_gf980.pdf]

# Aktuelle Aspekte zur Diagnostik und Therapie des Endometriumkarzinoms

## Current Issues in the Diagnosis and Treatment of Endometrial Carcinoma

Autoren

J. Stubert, B. Gerber

Institut

Universitätsfrauenklinik und Poliklinik Rostock, Rostock

### Schlüsselwörter

- Endometriumkarzinom
- paraaortale Lymphknotendissektion
- Endometriumdicke
- Ultraschall
- postmenopausale Blutung

### Key words

- endometrial carcinoma
- paraaortic lymph node dissection
- endometrial thickness
- ultrasound
- postmenopausal bleeding

### Zusammenfassung

Das Endometriumkarzinom ist das häufigste Karzinom des weiblichen Genitales. Führendes klinisches Zeichen ist die postmenopausale Blutung. Für die Diagnosestellung ist immer eine Endometriumbiopsie notwendig. Die Therapieentscheidung hängt von der Risikoeinschätzung des Karzinoms und der häufig vorliegenden Komorbidität ab. In Fällen mit niedrigem Risiko (Definition: pT1 a, G1/2) ist eine pelvine und paraaortale Lymphknotendissektion unnötig. Eine adjuvante Bestrahlung und eine Systemtherapie sind zumeist vermeidbar. Die Behandlung von Hochrisikopatientinnen (G3 und/oder pT1b) und von Patientinnen in palliativer Situation ist schwierig und weniger gut standardisiert. Neue, molekular definierte Subtypen könnten hier zukünftig Therapieentscheidungen erleichtern.

### Abstract

Endometrial carcinoma is the most common carcinoma of the female genital tract. Its most important clinical sign is postmenopausal bleeding. An endometrial biopsy is essential for diagnosis. Treatment decisions are governed by tumour risk assessment and patient comorbidity, which is often present. Pelvic and paraaortic lymph node dissection is unnecessary in low risk cases (definition: pT1 a, G1/2) and adjuvant radiotherapy and systemic treatments are usually avoidable. Treatment of high-risk patients (G3 and/or pT1b) and palliative cases is difficult and not well standardised. New molecular-based subtype classification may help treatment decision making in future.

### Einleitung

Entsprechend den Angaben des Robert Koch-Instituts liegt in Deutschland das Risiko einer Frau, in ihrem Leben an einem Endometriumkarzinom zu erkranken, bei 2,2% (jährliche Inzidenz ca. 28 Neuerkrankungen pro 100 000 Frauen). Bezogen auf die geschlechtsspezifische Häufigkeitsverteilung aller Karzinomerkrankungen rangiert es auf dem vierten Platz und ist, abgesehen vom Mammakarzinom, damit das häufigste gynäkologische Malignom [1]. Aufgrund der zumeist frühzeitig gestellten Diagnose, vorrangig infolge des Leitsymptoms der postmenopausalen Blutung (PMB), ist die Prognose im Vergleich zu den anderen gynäkologischen Malignomen günstig. Etwa 70% werden im Stadium T1 diagnostiziert. Die relative 5-Jahres-Überlebensrate liegt bei rund 81%. In der krebisbedingten Mortalitätsstatistik belegt es trotz der Häufigkeit lediglich den 11. Platz. Infolge des hohen mittleren Erkrankungsalters von 69

Jahren und der häufig bestehenden Komorbidität verstirbt ein nicht unwesentlicher Anteil der erkrankten Frauen an einer anderen, nicht karzinombedingten Ursache innerhalb der ersten 5 Jahre nach Diagnosestellung (absolute 5-Jahres-Überlebensrate 72%).

Aktuell diskutierte Fragestellungen betreffen das diagnostische Vorgehen wie auch die Definition einer stadiengerechten Therapie. Hier gilt es einerseits eine Übertherapie zu vermeiden und andererseits bei Patientinnen mit hohem Rezidivrisiko eine optimale Therapiestrategie zu finden.

### Übersicht

▼  
**Kann bei schmalem Endometrium trotz postmenopausaler Blutung (PMB) auf eine Biopsie verzichtet werden?**

Zielführend für die Diagnose des Endometriumkarzinoms ist in der überwiegenden Zahl der Fäl-

eingereicht 2.8.2015  
revidiert 15.9.2015  
akzeptiert 17.9.2015

### Bibliografie

**DOI** <http://dx.doi.org/10.1055/s-0035-1558230>  
Geburtsh Frauenheilk 2016; 76:  
1–6 © Georg Thieme Verlag KG  
Stuttgart · New York ·  
ISSN 0016-5751

### Korrespondenzadresse

**Dr. med. Johannes Stubert**  
Universitätsfrauenklinik  
und Poliklinik Rostock  
Südring 81  
18059 Rostock  
johannes.stubert@  
uni-rostock.de

**Tab. 1** Risikofaktoren für die Entwicklung eines Endometriumkarzinoms.

| Risikofaktor                                | geschätztes relatives Risiko |
|---------------------------------------------|------------------------------|
| <b>Adipositas</b>                           | <b>2–5</b>                   |
| höheres Alter                               | 2–3                          |
| PCO-Syndrom (Anovulation)                   | > 5                          |
| frühe Menarche                              | 1.5–2                        |
| späte Menopause                             | 2–3                          |
| Nulliparität/Infertilität                   | 3                            |
| Tamoxifen                                   | 2–3 (7)                      |
| Langzeitöstrogensubstitution ohne Gestagene | 6–9                          |
| orale Kontrazeptiva                         | 0,5                          |
| Diabetes mellitus Typ 2                     | 2–3                          |

le das Auftreten einer PMB. Sie stellt zumeist ein Frühsymptom dieser Erkrankung dar und sollte eine Biopsie des Endometriums nach sich ziehen. Üblicherweise wird in Deutschland und den meisten westeuropäischen Ländern die Hysteroskopie mit fraktionierter Abrasio durchgeführt. Aufgrund der Ungenauigkeit in der Trennung zwischen Zervix und Corpus sowie fehlender therapeutischer Konsequenzen ist die Bedeutung der Fraktionierung zu hinterfragen. Eine nicht nur in Deutschland selten praktizierte Alternative der Histologiegewinnung stellt die Vakuum-Saug-Biopsie dar [2]. Sie kann ambulant im Rahmen der gynäkologischen Untersuchung durchgeführt werden und benötigt keine Anästhesie. Optional kann nach vorheriger Lokalanästhesie mit z. B. 20%igem Benzocainspray eine Fixierung des Uterus durch Anheften der vorderen Muttermundslippe die Durchführung der Biopsie erleichtern. Eine vorausgehende Dilatation des Zervikalkanals zur Einführung des 3,1 mm dicken Polypropylenschafts ist in der Regel nicht notwendig. Durch die Möglichkeit, das Endometrium sonografisch mittels hochauflösender Transvaginalsonde zu beurteilen, stellt sich die Frage, ob in bestimmten Situationen trotz PMB auf eine Biopsie verzichtet werden kann. In einer Metaanalyse mit rund 2900 Patientinnen lag in 8,9% der Fälle einer postmenopausalen Blutung ein Endometriumkarzinom zugrunde [3]. Bei Festlegung eines Schwellenwerts von mehr als 3 mm Endometriumdicke würden 97,9% aller Karzinome entdeckt werden bei einer Falsch-positiv-Rate von 64,6% (d. h. knapp  $\frac{2}{3}$  der Patientinnen ohne Karzinom zeigten ebenfalls eine Endometriumdicke > 3 mm). Bei einer Endometriumdicke von  $\leq 3$  mm sank die Wahrscheinlichkeit, trotz PMB an einem Karzinom erkrankt zu sein, von rund 10% auf 0,6%. Die Autoren schlussfolgerten, dass bei einer Endometriumdicke  $\leq 3$  mm eine biopsische Abklärung verzichtbar sei. Problematisch bleiben jedoch die hiermit nicht erkannten Fälle an serösen Typ-II-Karzinomen. Die Arbeitsgemeinschaft Gynäkologische Onkologie (AGO) empfiehlt daher, jede PMB histologisch durch Hysteroskopie und fraktionierte Abrasio abzuklären [4]. Schwierig bleibt die Indikation zur Abklärung einer perimenopausalen Blutungsstörung. Bei Blutungen im Sinne einer Meno- oder Metrorrhagie ist insbesondere nach längerem blutungsfreiem Intervall oder auch bei typischer Risikokonstellation (metabolisches Syndrom) die Indikation zur Abrasio großzügig zu stellen.

#### Ist eine Biopsie bei hoch aufgebautem Endometrium in der Postmenopause ohne Blutung indiziert?

In einer britischen Fallkontrollstudie an über 48000 postmenopausalen Frauen wurde untersucht, wie häufig innerhalb eines Jahres nach Studieneinschluss in Abhängigkeit der sonografisch bestimmten Endometriumdicke ein Endometriumkarzi-

nom oder eine atypische Hyperplasie ohne PMB auftrat [5]. Bei 77,1% der Karzinome lag eine Endometriumdicke von  $\geq 5$  mm vor. Würde sich allerdings hieraus eine Indikation zur histologischen Abklärung ableiten, so würde nur in 1,4% tatsächlich ein Karzinom vorliegen. Der weitaus größte Teil hätte also kein Karzinom. Anders ausgedrückt müssten 58 Frauen histologisch abgeklärt werden, um einen Karzinomfall ohne PMB aufzudecken [6]. Trotzdem würden 19% der Frauen mit Karzinom bei diesem (eher niedrigem) Schwellenwert gar nicht erkannt werden. Eine histologische Untersuchung allein anhand sonografischer Kriterien sollte daher nicht erfolgen. Es ist außerdem zweifelhaft, ob im Falle einer Karzinomdiagnose die frühere Detektion auch eine Verbesserung der Prognose nach sich zieht. Prospektive Daten hierzu liegen nicht vor. In einer retrospektiven Analyse zeigte sich diesbezüglich kein Vorteil [7]. Sowohl das krankheitsfreie Überleben als auch das Gesamtüberleben unterschieden sich nicht zwischen Patientinnen, deren Karzinomdiagnose allein auf sonografischen Kriterien (Endometrium  $\geq 10$  mm und/oder Unregelmäßigkeiten des Endometriums) oder auf dem Auftreten einer PMB beruhten, vorausgesetzt, die Blutungen wurden nach Auftreten innerhalb eines Zeitraums von unter 8 Wochen abgeklärt [7]. In weiteren retrospektiven Analysen konnte ebenfalls kein Unterschied im krankheitsfreien Überleben als auch im Gesamtüberleben zwischen asymptomatischen Patientinnen und Patientinnen mit PMB festgestellt werden [8,9]. Schließlich dürfte ein nicht unerheblicher Anteil der Endometriumkarzinome klinisch nie evident werden, was eine 4–6-fache höhere Inzidenz an Endometriumkarzinomen im Rahmen einer Autopsiestudie zeigte [6,10]. Zusammenfassend ist festzustellen, dass aus den aktuellen Daten keine Indikation für ein sonografisches Screening abzuleiten ist und auch bei Zufallsbefund ohne begleitende PMB kein Vorteil durch eine weitergehende Abklärung zu erwarten ist. Dies gilt auch für Risikosituationen (metabolisches Syndrom, laufende Tamoxifen-Therapie [11]). Eine Ausnahme stellt lediglich der Nachweis eines Lynch-Syndroms dar. Hier beträgt das Lebenszeitrisko für ein Endometriumkarzinom 40–60% [12]. Vermutlich sind ca. 1,8% der Endometriumkarzinome auf ein Lynch-Syndrom zurückzuführen (Häufigkeit ca. 1:500). Die Erkrankung tritt dann gehäuft prämenopausal auf, sodass bei Diagnose eines Endometriumkarzinoms unter dem 50. Lebensjahr das Tumorpräparat gezielt auf das Vorliegen eines Lynch-Syndroms zu untersuchen ist [13]. Anamnestisch lässt sich die Diagnose dieser autosomal-dominant vererbten Störung der Mismatch-Reparaturgene anhand der Amsterdam-Kriterien stellen [12]. Bei nachgewiesener Erkrankung werden ab dem 35. Lebensjahr jährlich die Vaginalsonografie und die Endometriumbiopsie mittels Vakuum-Saug-Methode empfohlen. Darüber hinaus sollte nach Abschluss der Familienplanung die prophylaktische Hysterektomie erwogen werden.

#### Therapie der Vorstufen

Während die WHO-Klassifikation von 1994 noch eine Unterteilung der Endometriumhyperplasien in 4 Kategorien vorsah, wurde die aktuelle Klassifikation von 2014 vereinfacht und unterscheidet nur noch Formen mit und ohne Atypien [14]. Atypische Hyperplasien (Syn. endometrioid intraepitheliale Neoplasie [EIN]) weisen molekulargenetisch bereits zahlreiche Veränderungen invasiver Karzinome auf, und lediglich das Auftreten von Atypien ist mit einer deutlichen Steigerung des Karzinomrisikos verbunden (● **Tab. 3**) [15]. In diesen Fällen ist nach über 10 Jahren in rund 30% der Fälle mit der Entwicklung eines Karzinoms zu rechnen [16]. Neben der Gefahr einer Progression zu einem in-

**Tab. 2** Risikoläsionen und Progressionswahrscheinlichkeit [15]. In der aktuellen WHO-Klassifikation der Hyperplasien wird nur noch das Auftreten von Atypien berücksichtigt.

| Typ                              | Progression in invasives Karzinom (im Mittel nach 13,4 Jahren) |
|----------------------------------|----------------------------------------------------------------|
| einfache Hyperplasie             | 1 %                                                            |
| komplexe Hyperplasie             | 3 %                                                            |
| einfache Hyperplasie mit Atypien | 8 %                                                            |
| komplexe Hyperplasie mit Atypien | 29 %                                                           |

vasiven Karzinom ist zu berücksichtigen, dass in bis zu 48 % der Fälle am Hysterektomiepräparat bereits ein invasives Karzinom gefunden wird [17,18]. Außerdem wurden in einer Untersuchung 29 % der Fälle mit atypischer Hyperplasie nach pathologischer Zweitbefundung als invasives Karzinom eingestuft [17]. Hyperplasien ohne Atypien hingegen entwickeln im Verlauf nur selten (< 5 %) ein invasives Karzinom [16].

Es leiten sich nachfolgende Therapieempfehlungen ab: Hyperplasien ohne Atypien können konservativ behandelt werden. Bei prämenopausalen Patientinnen ist eine Therapie mit Gestagen zu empfehlen (z. B. 10–20 mg MPA vom 12.–25. Zyklustag). Alternativ ist die lokale Therapie mit einem gestagenhaltigen Intrauterinpressar (z. B. Mirena®) oder bei PCO-Syndrom und unregelmäßigen Zyklen einem monophasischen, gestagenbetonten Kontrazeptivum zu empfehlen. Im Vergleich zur oralen Therapie zeigt die Behandlung mittels gestagenhaltigem IUD bessere Rückbildungsraten (95–100 % vs. 64–84 %) [19,20]. Nach 3 bis 6 Monaten ist eine Kontrollsonografie und bei Auffälligkeiten eine erneute Abrasio anzuschließen [21]. Bei postmenopausalen Patientinnen ist eine kontinuierliche Gestagentherapie mit 2,5 mg MPA täglich zu erwägen, alternativ sind Verlaufskontrollen ohne medikamentöse Therapie möglich. Wurden zusätzlich Atypien nachgewiesen, ist die Hysterektomie zu empfehlen. Bei bestehendem Kinderwunsch ist ein individualisiertes Vorgehen erforderlich. Die Patientin ist darüber aufzuklären, dass die Atypien trotz Gestagentherapie in 14 % persistieren und in 3–7 % eine Progression aufweisen [22,23]. Schließlich kommt es in einem Viertel der Fälle zu einem Rezidiv. Wichtigster Risikofaktor ist vor allem eine vorbestehende Adipositas mit einem Body-Mass-Index

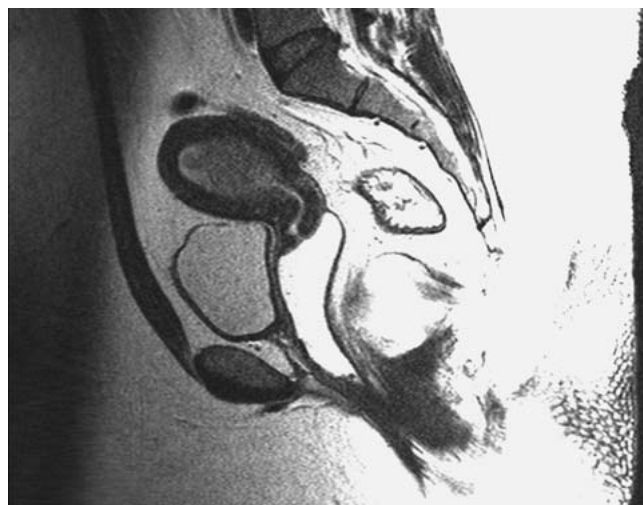

**Abb. 1** Hochaufgelöstes MRT des kleinen Beckens nach Gelfüllung der Vagina. 25-jährige Patientin (BMI 59,5 kg/m<sup>2</sup>) mit histologisch gesichertem endometrioidem Adenokarzinom des Corpus uteri. Zustand nach fraktionierter Abrasio bei Hypermenorrhö. Präoperative Darstellung des intrauterinen Tumors mit umgebendem Myometrium. Postoperativ pT1b (Infiltrationstiefe maximal 17/20 mm) pN1 (1/36) cM0 L1 Pn0 V0 R0 G2. Kein Anhalt für Mikrosatelliteninstabilität (durchgehend positive Expression von MLH1, MSH2, MSH6 und PMS2).

≥ 35 kg/m<sup>2</sup>. In diesen Fällen empfiehlt sich eine zusätzliche Metformintherapie [24]. Auch hier sind die Ergebnisse bei Verwendung eines Levonorgestrel freisetzenden Intrauterinpressars (Mirena®) günstiger als unter einer oralen Gestagentherapie [25,26]. Entscheidend ist eine engmaschige sonografische Kontrolle des Endometriums mit Re-Biopsien nach 3 und 6 Monaten sowie einer Hysterektomie, sobald die Familienplanung abgeschlossen ist. Zusätzlich besteht die Möglichkeit, mittels MRT-Diagnostik die Infiltrationstiefe abzuschätzen (● Abb. 1).

### Neue molekulare Klassifikation

Tumorstadium (● Tab. 2) und Differenzierungsgrad sind unverändert wichtige Prognosefaktoren des Endometriumkarzinoms. Darüber hinaus kommt dem histologischen Subtyp eine wichtige prognostische Bedeutung zu. Gemäß dem klassischen Konzept

**Tab. 3** Molekulare Klassifikation des Endometriumkarzinoms [27,28]. Unterschieden werden 4 Subtypen. Trotz hoher Mutationsrate weisen die POLE-(Polymerase ε-)mutierten Formen (5–6 % aller Endometriumkarzinome, überwiegend jüngere Patientinnen) eine gute Prognose auf. Der MSI-Typ ist mit dem Auftreten eines Lynch-Syndroms assoziiert. Eine Subgruppe endometrioider Karzinome lässt sich molekularbiologisch den serösen Karzinomen zuordnen.

| Typ                                             | POLE (ultramutiert)                          | MSI (hypermuriert) | Copy-number low (endometrioid) | Copy-number high (serous-like)   |
|-------------------------------------------------|----------------------------------------------|--------------------|--------------------------------|----------------------------------|
| Copy-number aberrations (Kopienzahlvariation)   | niedrig                                      | niedrig            | niedrig                        | hoch                             |
| MSI/MLH1-Methylierung*                          | gemischt mit hoher und niedriger MSI, stabil | hohe MSI           | MSI stabil                     | MSI stabil                       |
| Mutationsrate                                   | sehr hoch                                    | hoch               | niedrig                        | niedrig                          |
| Auswahl häufig mutierter Gene (Häufigkeit in %) | POLE (100%)<br>PTEN (94%)                    | PTEN (88%)         | PTEN (77%)                     | TP53 (92%)                       |
| histologischer Subtyp                           | endometrioid                                 | endometrioid       | endometrioid                   | serös, endometrioid und gemischt |
| Grading                                         | G1–3                                         | G1–3               | G1–2                           | G3                               |
| Prognose                                        | gut                                          | mittel             | mittel                         | schlecht                         |

\* MSI – Mikrosatelliteninstabilität, MLH1 – Mismatch-Reparaturgen, welches infolge DNA-Methylierung inaktiviert ist; liegt eine Keimbahnmutation vor, handelt es sich um ein Lynch-Syndrom

wird zwischen den endometrioiden Typ-I- und den serös/klarzelligen Typ-II-Karzinomen unterschieden [27]. Erstere entwickeln sich auf dem Boden einer chronischen östrogenen Stimulation (klassische Risikofaktoren!) (● **Tab. 1**) über die hyperplastischen Vorstufen und weisen prinzipiell eine günstige Prognose auf. Typ-II-Karzinome finden sich in ca. 30% der Fälle. Sie entwickeln sich östrogenunabhängig auf dem Boden eines atrophischen Endometriums, sind durch eine schlechte Differenzierung und eine hohe Aggressivität gekennzeichnet und liegen bei Diagnose nicht selten in einem höheren Tumorstadium (FIGO III–IV) vor. Beiden Subtypen liegen charakteristische Mutationsmuster zugrunde (Typ I mit PTEN-Mutation in bis zu 80%, Typ II mit p53-Mutation in über 90%). Neue molekulargenetische Analysen zeigten jedoch, dass insbesondere der endometrioider Typ I in weitere Subklassen zu unterteilen ist. Ein Teil der endometrioiden Karzinome sind molekulargenetisch sogar den serösen Typ-II-Karzinomen zuzuordnen. Aktuell lassen sich damit 4 Subklassen unterscheiden, die unterschiedliche Prognosen aufweisen und zukünftig wegweisend für risikoadaptierte Therapieentscheidungen sein könnten (● **Tab. 3**) [27,28]. Von besonderer Bedeutung könnte hierfür der Umstand sein, dass die hypermutierten Karzinome aufgrund der Expression zahlreicher Neoantigene potenzielle Zielstrukturen für die Vermittlung einer körpereigenen Immunabwehr präsentieren. Diese antitumoröse Zytotoxizität wird jedoch über eine Selbsttoleranz vermittelnde Interaktion von lymphozytären PD-(Programmed-Death-)Rezeptoren und deren auf den Tumorzellen befindlichen Liganden (PD-L1) verhindert [29]. Eine antikörpervermittelte Blockade dieses „Rescue“-Mechanismus durch sogenannte Immun-Checkpoint-Inhibitoren könnte zukünftig von therapeutischer Bedeutung sein und wird derzeit in klinischen Studien untersucht [30].

#### Wann ist eine Lymphknotendisektion indiziert?

Lymphknotenmetastasen treten bei Endometriumkarzinomen mit niedrigem Risiko (pT1 a G1/2) in weniger als 2% auf [31]. Eine Lymphknotendisektion ist in dieser Situation ohne therapeutischen Benefit, erhöht jedoch die Morbidität und damit auch die Behandlungskosten erheblich [32–35]. Die krankheitsspezifische 5-Jahres-Überlebensrate liegt auch bei Verzicht auf eine Lymphknotendisektion in diesem Tumorstadium bei über 95% und sollte aus diesem Grund nicht erfolgen [36]. Bei Vorliegen einer myometranen Infiltration über 50% oder eines schlecht differenzierten Karzinoms (G3) bzw. eines serös/klarzelligen Subtyps steigt das Risiko einer lymphogenen Streuung sprunghaft an. In diesem Fall ist eine Lymphknotendisektion anzustreben. Aufgrund des uterinen Lymphabflusses sowohl über die Parametrien (kaudaler Part) als auch über die Adnexe (kranialer Part) sind die pelvinen und die paraaortalen Lymphknoten systematisch zu entfernen. Idealerweise besteht die Möglichkeit einer intraoperativen Schnellschnittbeurteilung der Infiltrationstiefe durch einen Pathologen.

#### Welche Optionen der Hysterektomie kommen infrage?

Entsprechend den Ergebnissen der GOG-Lap2-Studie ist ein laparoskopisches Vorgehen dem konventionellen Zugang per Laparotomie onkologisch gleichwertig [37]. In dieser Studie fanden sich nach 5 Jahren weder signifikante Unterschiede bez. der Rezidivraten (11,4 vs. 10,2%, HR 1,14) noch des Gesamtüberlebens. Rund 70% aller eingeschlossenen Patientinnen wiesen ein FIGO-Stadium IA auf. Nach laparoskopischem Vorgehen waren die Patientinnen im Durchschnitt schneller mobilisiert mit weniger Komplikationen. Besonders adipöse Patientinnen profitierten

von einer Laparoskopie trotz erhöhter technischer Schwierigkeiten in dieser Situation.

Komorbiditäten, insbesondere höhergradige Adipositas, sind häufig limitierende Faktoren in der operativen Therapie der Endometriumkarzinome. In diesen Fällen ist die vaginale Hysterektomie (wenn möglich mit Adnexektomie) eine komplikationsarme Alternative mit 5-Jahres-Überlebensraten von über 90% im FIGO-Stadium I [38].

Unter Annahme einer parametranen Karzinomausbreitung wurde früher bei Zervixbefall eine radikale Hysterektomie empfohlen. Pathologische Untersuchungen zeigten jedoch, dass auch bei lokal fortgeschrittenen Karzinomen eine parametranen Infiltration in unter 10% auftritt. In einer Analyse an 334 radikal operierten Hysterektomiepräparaten wies keine der 16 Patientinnen mit FIGO-Stadium II eine parametranen Infiltration auf und weniger als 20% aller Fälle mit Parametrieninfiltration zeigten überhaupt eine zervikale Beteiligung [39]. Am häufigsten (21,3%) war die parametranen Ausdehnung im FIGO-Stadium III (alte Klassifikation) zu finden. In dieser Gruppe wird jedoch die Prognose durch die hohe Rate an Fernmetastasen bestimmt. Eine operative Entfernung der Parametrien im FIGO-Stadium II wird aktuell auch vonseiten der AGO nicht mehr empfohlen.

#### Stellenwert der adjuvanten Strahlentherapie im FIGO-Stadium I

Die Indikation zu einer adjuvanten Radiotherapie im FIGO-Stadium I erfolgt risikoadaptiert. Eine perkutane Bestrahlung (Teletherapie) führt gemäß einer Cochrane-Metaanalyse (7 Studien mit 3628 Patientinnen) zwar zu einer Reduktion lokoregionärer Rezidive (HR 0,36; 95%-KI 0,25–0,52), verbessert jedoch weder das Gesamt- noch das karzinomspezifische Überleben – dies gilt auch bei isolierter Betrachtung von FIGO-I-Hochrisikofällen [40]. Dies mag u. a. daran liegen, dass durch die Radiotherapie das Auftreten von Fernmetastasen nicht effektiv beeinflusst wird (RR 1,04; 95%-KI 0,80–1,35). Bei niedrigem Risiko (G1/2, pT1 a) scheint die Teletherapie sogar nachteilig für die Betroffenen zu sein. Das karzinomspezifische Überleben war in dieser wichtigen Subgruppe schlechter (RR 2,64; 95%-KI 1,05–6,66). Im 20-Jahres-Follow-up einer norwegischen Studie (n = 568 Patientinnen) zeigte die Teletherapie im Stadium I keinen Überlebensvorteil, die Mortalität der Patientinnen unter 60 Jahren war in der perkutan bestrahlten Gruppe sogar signifikant höher (HR 1,36; 95%-KI 1,06–1,76), was vermutlich Folge einer erhöhten Rate an sekundären Karzinomen war (HR 2,02; 95%-KI 1,30–3,15) [41]. Zudem war die Morbidität durch eine Teletherapie infolge chronischer Strahlenschäden an Blase und Darm erhöht. Im direkten Vergleich war die Brachytherapie der Teletherapie bez. des Auftretens lokoregionärer Rezidive im FIGO-Stadium I nicht unterlegen [42]. Bei Low-Risk-Fällen ist der risikoreduzierende Effekt der Brachytherapie so gering [43], dass in dieser Situation (G1/2, pT1 a, endometrioider Typ) auf eine Bestrahlung verzichtet werden sollte. Bei intermediärem Risiko (FIGO IA und G3 oder FIGO IB und G1/2) ist aktuell die Brachytherapie zu empfehlen; inwieweit auch hier ein Verzicht möglich ist, wird aktuell in der PORTEC-4-Studie untersucht. Bei hohem Risiko ( $\geq$  FIGO IB, G3) ist eine adjuvante Bestrahlung durchzuführen – nach individueller Entscheidung (z. B. bei Verzicht auf ein Lymphknotenstaging) auch perkutan.

#### Ab wann ist eine adjuvante Systemtherapie zu empfehlen?

Endometrioider Karzinome ab Stadium FIGO IB, G3 sowie alle serös-papillären/klarzelligen Subtypen weisen eine ungünstige

Prognose mit 5-Jahres-Überlebensraten unter 60% auf [44]. Die schlechte Prognose ist Folge der hohen Rate an Fernmetastasen und ließe sich lediglich durch eine effektive adjuvante Systemtherapie verbessern. In eine Cochrane-Metaanalyse wurden alle randomisierten, kontrollierten Studien mit Hochrisikofällen eingeschlossen [45]. Beinahe alle Studien waren platinbasiert (Cisplatin). Prinzipiell wurde die Effektivität einer adjuvanten Chemotherapie verglichen mit a) keiner weiteren Systemtherapie nach regulärer Durchführung von OP und Radiatio oder b) konkurrierend im direkten Vergleich mit einer adjuvanten Radiatio. Die Ergebnisse zeigten, dass bezogen auf ein 5-Jahres-Gesamtüberleben eine adjuvante Chemotherapie eine signifikante Verbesserung bewirkt (HR 0,88; 95%-KI 0,79–0,99). Das Risiko zu versterben wurde absolut um 3% reduziert. Um einen Todesfall zu vermeiden, mussten 30 Patientinnen therapiert werden (number needed to treat, NNT). Betrachtet man nur die neueren, platinbasierten Studien, ist der Effekt sogar noch günstiger mit einer NNT von 25. Der positive Effekt war besonders deutlich im direkten Vergleich Chemotherapie vs. Radiatio (HR 0,87; 95%-KI 0,76–0,99), weist hingegen nur einen positiven Trend für eine adjuvante Chemotherapie auf, wenn bereits eine adjuvante Bestrahlung erfolgte (HR 0,94; 95%-KI 0,72–1,22). Die AGO empfiehlt eine adjuvante Carboplatin-Paclitaxel-Chemotherapie ab Stadium FIGO IB, G3 bis FIGO III und bei allen serösen und klarzelligen Karzinomen sequenziell zur Strahlentherapie. Eine adjuvante endokrine Therapie zeigt keine Effektivität und wird auch vonseiten der AGO ausdrücklich nicht empfohlen.

In praxi zu berücksichtigen ist die hohe Rate an z. T. schweren Komorbiditäten bei den betroffenen Patientinnen, die für die Prognose quoad vitam in vielen Fällen maßgeblich sind und somit den therapeutischen Benefit einer adjuvanten Systemtherapie prinzipiell relativieren. Nicht zuletzt werden allein dadurch die Einsatzmöglichkeiten der Chemotherapie stark begrenzt.

### Therapieoptionen in der Rezidivsituation

Die Datenlage für Therapieempfehlungen in der Rezidivsituation ist schlecht. Falls möglich sollte bei lokoregionären und intraabdominalen Rezidiven eine operative Sanierung angestrebt werden. Primäres Ziel sollte eine Komplettresektion sein. Bei Inoperabilität oder auch postoperativem Tumorrest eines lokoregionären Rezidivs ist eine Bestrahlung durchzuführen. Eine intraoperative Clipmarkierung kann helfen, das Bestrahlungsvolumen besser zu definieren. Die palliative Systemtherapie sollte Fällen vorbehalten bleiben, bei denen die erstgenannten Optionen nicht durchführbar sind. First Line ist analog zur adjuvanten Situation eine platinhaltige Therapie gegebenenfalls in Kombination mit einem Taxan zu empfehlen. Alternativ kann auch ein Anthrazyklin eingesetzt werden, wobei aufgrund der Verträglichkeit pegyliertes liposomales Doxorubicin vorzuziehen ist [46]. Weitere Substanzen wie Ifosfamid, Topotecan oder Ixabepilone zeigen als Monosubstanzen Ansprechraten zwischen 10–20%. Liegt ein Tumor mit positiven Estrogen- und/oder Progesteronrezeptoren vor, kann bei Low-Grade-Tumoren auch eine endokrine Therapie durchgeführt werden. Die Ansprechraten der einzelnen Substanzen sind vergleichbar (● Tab. 4) [47].

### Sonderfall: Karzinosarkom

Das prognostisch ungünstige Karzinosarkom (Syn. maligner Müllerscher Misch tumor) sollte analog der High-Risk-Endometriumkarzinome mittels Hysterektomie inklusive Adnexe sowie einer pelvinen und paraaortalen Lymphknotendissektion operiert werden [48]. Eine Bestrahlung führt auch hier zu keinem Über-

**Tab. 4** Ansprechraten endokriner Therapien in der palliativen Situation bei endokrin sensitiven (Hormonrezeptorstatus positiv) Low-Grade-Karzinomen [47]. Die Ansprechraten der gängigen Monotherapie sind mit 10–20% der endokrinen Therapie vergleichbar.

| endokrine Substanz                          | Ansprechraten            |
|---------------------------------------------|--------------------------|
| Gestagene (z. B. MPA 200 mg/d)              | 11–56%                   |
| Tamoxifen                                   | 10–35%                   |
| GnRH-Analoga                                | 11%                      |
| Aromatasehemmer                             | 9%                       |
| Fulvestrant                                 | Wirksamkeit nachgewiesen |
| Onapriston (Progesteron-rezeptorantagonist) | ?                        |

lebensvorteil, reduziert aber das Lokalrezidivrisiko [49]. Eine adjuvante Chemotherapie kann das Überleben bei lokal fortgeschrittenen Karzinomen wie auch nach Rezidivoperation verbessern. Empfohlen wird eine Kombination aus Ifosfamid und Paclitaxel (GOG-161-Studie). Alternativ kann Paclitaxel auch mit Carboplatin kombiniert werden (geringere Toxizität, Ansprechraten 54–62%).

### Schlussfolgerungen

Das Endometriumkarzinom kann infolge einer postmenopausalen Blutung in der überwiegenden Zahl der Fälle früh diagnostiziert werden. Die sonografische Messung der Endometriumdicke kann bei der Risikoabschätzung bez. des Auftretens eines Endometriumkarzinoms hilfreich sein. Da durch diese Maßnahme jedoch keine Verbesserung der Prognose nachweisbar war und die Gefahr besteht, die am atrophischen Endometrium auftretenden Typ-2-Karzinome zu übersehen, sollte die alleinige Sonografie weder zur Früherkennung asymptomatischer Frauen verwendet werden, noch als Instrument der Entscheidungsfindung für die weitere Abklärung einer postmenopausalen Blutung dienen. Bei der Therapie früher Krankheitsstadien mit niedrigem Rezidivrisiko kann sowohl auf eine Lymphknotendissektion als auch auf eine Strahlentherapie verzichtet werden. Die Therapie der Karzinome mit hohem Rezidivrisiko ist multimodal und sollte neben einem ausgedehnten operativen Vorgehen und einer Bestrahlung auch eine Chemotherapie umfassen. Aufgrund von Komorbiditäten bei den Patientinnen ist eine leitliniengerechte Therapie jedoch häufig nicht umsetzbar. Neue, molekularbiologisch basierte Risikoklassifikationen werden wohl zukünftig für Therapieentscheidungen von Relevanz sein.

### Interessenkonflikt

Die Autoren erklären, dass kein Interessenkonflikt besteht.

### Literatur

- 1 Robert Koch-Institut; Gesellschaft der epidemiologischen Krebsregister in Deutschland e.V., Hrsg. Krebs in Deutschland 2009/2010. 9. Ausgabe. Berlin: 2013
- 2 Zuber TJ. Endometrial biopsy. Am Fam Physician 2001; 63: 1131–1135; 1137–1141
- 3 Timmermans A, Opmeer BC, Khan KS et al. Endometrial thickness measurement for detecting endometrial cancer in women with postmenopausal bleeding: a systematic review and meta-analysis. Obstet Gynecol 2010; 116: 160–167

- 4 AGO-Kommission Uterus. Empfehlungen für die Diagnostik und Therapie des Endometriumkarzinoms. April 2015. Online: [http://www.ago-online.de/fileadmin/downloads/leitlinien/uterus/empfehlungen\\_diagnostik\\_therapie\\_EC.pdf](http://www.ago-online.de/fileadmin/downloads/leitlinien/uterus/empfehlungen_diagnostik_therapie_EC.pdf); Stand: 02.08.2015
- 5 Jacobs I, Gentry-Maharaj A, Burnell M *et al.* Sensitivity of transvaginal ultrasound screening for endometrial cancer in postmenopausal women: a case-control study within the UKTOCS cohort. *Lancet Oncol* 2011; 12: 38–48
- 6 Vergote I, Amant F, Timmerman D. Should we screen for endometrial cancer? *Lancet Oncol* 2011; 12: 4–5
- 7 Gerber B, Krause A, Muller H *et al.* Ultrasonographic detection of asymptomatic endometrial cancer in postmenopausal patients offers no prognostic advantage over symptomatic disease discovered by uterine bleeding. *Eur J Cancer* 2001; 37: 64–71
- 8 Barak F, Kalichman L, Gdalevich M *et al.* The influence of early diagnosis of endometrioid endometrial cancer on disease stage and survival. *Arch Gynecol Obstet* 2013; 288: 1361–1364
- 9 Seebacher V, Schmid M, Polterauer S *et al.* The presence of postmenopausal bleeding as prognostic parameter in patients with endometrial cancer: a retrospective multi-center study. *BMC Cancer* 2009; 9: 460
- 10 Horwitz RI, Feinstein AR, Horwitz SM *et al.* Necropsy diagnosis of endometrial cancer and detection-bias in case/control studies. *Lancet* 1981; 2: 66–68
- 11 Gerber B, Krause A, Muller H *et al.* Effects of adjuvant tamoxifen on the endometrium in postmenopausal women with breast cancer: a prospective long-term study using transvaginal ultrasound. *J Clin Oncol* 2000; 18: 3464–3470
- 12 Steinke V, Engel C, Buttner R *et al.* Hereditary nonpolyposis colorectal cancer (HNPCC)/Lynch syndrome. *Dtsch Arztebl Int* 2013; 110: 32–38
- 13 Uterine Neoplasms – NCCN Clinical Practice Guidelines in Oncology. Version 2.2015. 2015. Online: [https://www.nccn.org/store/login/login.aspx?ReturnURL=http://www.nccn.org/professionals/physician\\_gls/pdf/uterine.pdf](https://www.nccn.org/store/login/login.aspx?ReturnURL=http://www.nccn.org/professionals/physician_gls/pdf/uterine.pdf); Stand: 02.08.2015
- 14 Emons G, Beckmann MW, Schmidt D *et al.* New WHO classification of endometrial hyperplasias. *Geburtsh Frauenheilk* 2015; 75: 135–136
- 15 Kurman RJ, Kaminski PF, Norris HJ. The behavior of endometrial hyperplasia. A long-term study of “untreated” hyperplasia in 170 patients. *Cancer* 1985; 56: 403–412
- 16 Lacey JV Jr., Sherman ME, Rush BB *et al.* Absolute risk of endometrial carcinoma during 20-year follow-up among women with endometrial hyperplasia. *J Clin Oncol* 2010; 28: 788–792
- 17 Trimble CL, Kauderer J, Zaino R *et al.* Concurrent endometrial carcinoma in women with a biopsy diagnosis of atypical endometrial hyperplasia: a Gynecologic Oncology Group study. *Cancer* 2006; 106: 812–819
- 18 Suh-Burgmann E, Hung YY, Armstrong MA. Complex atypical endometrial hyperplasia: the risk of unrecognized adenocarcinoma and value of preoperative dilation and curettage. *Obstet Gynecol* 2009; 114: 523–529
- 19 Gallos ID, Krishan P, Shehmar M *et al.* LNG-IUS versus oral progestogen treatment for endometrial hyperplasia: a long-term comparative cohort study. *Hum Reprod* 2013; 28: 2966–2971
- 20 Dolapcioglu K, Boz A, Baloglu A. The efficacy of intrauterine versus oral progestin for the treatment of endometrial hyperplasia. A prospective randomized comparative study. *Clin Exp Obstet Gynecol* 2013; 40: 122–126
- 21 Denschlag D, Ulrich U, Emons G. The diagnosis and treatment of endometrial cancer: progress and controversies. *Dtsch Arztebl Int* 2010; 108: 571–577
- 22 Gunderson CC, Fader AN, Carson KA *et al.* Oncologic and reproductive outcomes with progestin therapy in women with endometrial hyperplasia and grade 1 adenocarcinoma: a systematic review. *Gynecol Oncol* 2012; 125: 477–482
- 23 Gallos ID, Yap J, Rajkhowa M *et al.* Regression, relapse, and live birth rates with fertility-sparing therapy for endometrial cancer and atypical complex endometrial hyperplasia: a systematic review and metaanalysis. *Am J Obstet Gynecol* 2012; 207: 266.e1–266.e12
- 24 Shan W, Wang C, Zhang Z *et al.* Conservative therapy with metformin plus megestrol acetate for endometrial atypical hyperplasia. *J Gynecol Oncol* 2014; 25: 214–220
- 25 Orbo A, Vereide A, Arnes M *et al.* Levonorgestrel-impregnated intrauterine device as treatment for endometrial hyperplasia: a national multicentre randomised trial. *BJOG* 2014; 121: 477–486
- 26 Gallos ID, Shehmar M, Thangaratnam S *et al.* Oral progestogens vs. levonorgestrel-releasing intrauterine system for endometrial hyperplasia: a systematic review and metaanalysis. *Am J Obstet Gynecol* 2010; 203: 547.e1–547.e10
- 27 Murali R, Soslow RA, Weigelt B. Classification of endometrial carcinoma: more than two types. *Lancet Oncol* 2014; 15: e268–e278
- 28 Cancer Genome Atlas Research Network, Kandoth C, Schultz N *et al.* Integrated genomic characterization of endometrial carcinoma. *Nature* 2013; 497: 67–73
- 29 McDermott DF, Atkins MB. PD-1 as a potential target in cancer therapy. *Cancer Med* 2013; 2: 662–673
- 30 Le DT, Uram JN, Wang H *et al.* PD-1 blockade in tumors with mismatch-repair deficiency. *N Engl J Med* 2015; 372: 2509–2520
- 31 Milam MR, Java J, Walker JL *et al.* Nodal metastasis risk in endometrioid endometrial cancer. *Obstet Gynecol* 2012; 119: 286–292
- 32 Benedetti Panici P, Basile S, Maneschi F *et al.* Systematic pelvic lymphadenectomy vs. no lymphadenectomy in early-stage endometrial carcinoma: randomized clinical trial. *J Natl Cancer Inst* 2008; 100: 1707–1716
- 33 ASTEC study group, Kitchener H, Swart AM *et al.* Efficacy of systematic pelvic lymphadenectomy in endometrial cancer (MRC ASTEC trial): a randomised study. *Lancet* 2009; 373: 125–136
- 34 Todo Y, Kato H, Kaneuchi M *et al.* Survival effect of para-aortic lymphadenectomy in endometrial cancer (SEPAL study): a retrospective cohort analysis. *Lancet* 2010; 375: 1165–1172
- 35 Dowdy SC, Borah BJ, Bakkum-Gamez JN *et al.* Prospective assessment of survival, morbidity, and cost associated with lymphadenectomy in low-risk endometrial cancer. *Gynecol Oncol* 2012; 127: 5–10
- 36 Bell JG, Patterson DM, Klima J *et al.* Outcomes of patients with low-risk endometrial cancer surgically staged without lymphadenectomy based on intra-operative evaluation. *Gynecol Oncol* 2014; 134: 505–509
- 37 Walker JL, Piedmonte MR, Spirtos NM *et al.* Recurrence and survival after random assignment to laparoscopy versus laparotomy for comprehensive surgical staging of uterine cancer: Gynecologic Oncology Group LAP2 Study. *J Clin Oncol* 2012; 30: 695–700
- 38 Lelle RJ, Morley GW, Peters WA. The role of vaginal hysterectomy in the treatment of endometrial carcinoma. *Int J Gynecol Cancer* 1994; 4: 342–347
- 39 Watanabe Y, Satou T, Nakai H *et al.* Evaluation of parametrial spread in endometrial carcinoma. *Obstet Gynecol* 2010; 116: 1027–1034
- 40 Kong A, Johnson N, Kitchener HC *et al.* Adjuvant radiotherapy for stage I endometrial cancer: an updated Cochrane systematic review and meta-analysis. *J Natl Cancer Inst* 2012; 104: 1625–1634
- 41 Onsrud M, Cvancarova M, Hellebust TP *et al.* Long-term outcomes after pelvic radiation for early-stage endometrial cancer. *J Clin Oncol* 2013; 31: 3951–3956
- 42 Nout RA, Smit VT, Putter H *et al.* Vaginal brachytherapy versus pelvic external beam radiotherapy for patients with endometrial cancer of high-intermediate risk (PORTEC-2): an open-label, non-inferiority, randomised trial. *Lancet* 2010; 375: 816–823
- 43 Sorbe B, Nordstrom B, Maenpaa J *et al.* Intravaginal brachytherapy in FIGO stage I low-risk endometrial cancer: a controlled randomized study. *Int J Gynecol Cancer* 2009; 19: 873–878
- 44 Pectasides D, Pectasides E, Economopoulos T. Systemic therapy in metastatic or recurrent endometrial cancer. *Cancer Treat Rev* 2007; 33: 177–190
- 45 Johnson N, Bryant A, Miles T *et al.* Adjuvant chemotherapy for endometrial cancer after hysterectomy. *Cochrane Database Syst Rev* 2011; DOI: 10.1002/14651858.CD003175.pub2
- 46 Goldfinger M, Diaz I, Muggia F. Systemic treatment of endometrial cancer: what is doxorubicin's role? *J Clin Oncol* 2014; 32: 2181–2182
- 47 Carlson MJ, Thiel KW, Leslie KK. Past, present, and future of hormonal therapy in recurrent endometrial cancer. *Int J Womens Health* 2014; 6: 429–435
- 48 Gurumurthy M, Somoye G, Cairns M *et al.* An update on the management of uterine carcinosarcoma. *Obstet Gynecol Surv* 2011; 66: 710–716
- 49 Galaal K, van der Heijden E, Godfrey K *et al.* Adjuvant radiotherapy and/or chemotherapy after surgery for uterine carcinosarcoma. *Cochrane Database Syst Rev* 2013; 2: CD006812
